# Supplementary material for: Supported Rh-phosphine complex catalysts for continuous gas-phase decarbonylation of aldehydes
Source: Royal Society of Chemistry journal article supplement (doi:10.1039/c4dt01629g), 2014-01-01
Supplement: c4dt01629g1.pdf [file c4dt01629g1.pdf]

## Supported Rh-Phosphine Complex Catalysts for Continuous Gas-Phase Decarbonylation of Aldehydes

Phillip Malcho,<sup>1</sup> Eduardo J. Garcia-Suarez,<sup>1</sup> Uffe Vie Mentzel,<sup>1</sup> Christian Engelbrekt<sup>2</sup> and Anders Riisager<sup>1\*</sup>

<sup>1</sup>Centre for Catalysis and Sustainable Chemistry, Department of Chemistry, Technical University of Denmark, DK-2800 Kgs. Lyngby, Denmark

<sup>2</sup>Department of Chemistry, Technical University of Denmark, DK-2800 Kgs. Lyngby, Denmark

\*Corresponding author: Tel: +45 45252233; Fax: +45 45883136; E-mail: [ar@kemi.dtu.dk](mailto:ar@kemi.dtu.dk)

### Supporting Information

#### Table of contents

- S1** FTIR spectra before and after reaction: a) Rh and b) Ir samples compared to the silica support material.
- S2** EDX spectrum of [Rh(dppp)<sub>2</sub>]Cl/SiO<sub>2</sub> (3 wt.% Rh).
- S3** EDX measurements of metal loading and phosphor content before and after decarbonylation reaction.
- S4** TGA profiles for a) [Rh(dppp)<sub>2</sub>]Cl/SiO<sub>2</sub>, b) [Rh(dppp)<sub>2</sub>]Cl/SiO<sub>2</sub>, c) [Rh(COD)Cl]<sub>2</sub>/SiO<sub>2</sub>, d) RhCl<sub>3</sub>/SiO<sub>2</sub>, e) silica-90 and f) temperature profile for the TGA measurements (heating rate of 5 °C/min from room temperature to 260 °C followed by constant temperature for 6 h).
- S5** TEM micrographs and corresponding fast Fourier transforms (FFTs) showing atomic resolution of the nanoparticles formed during the catalytic reaction.

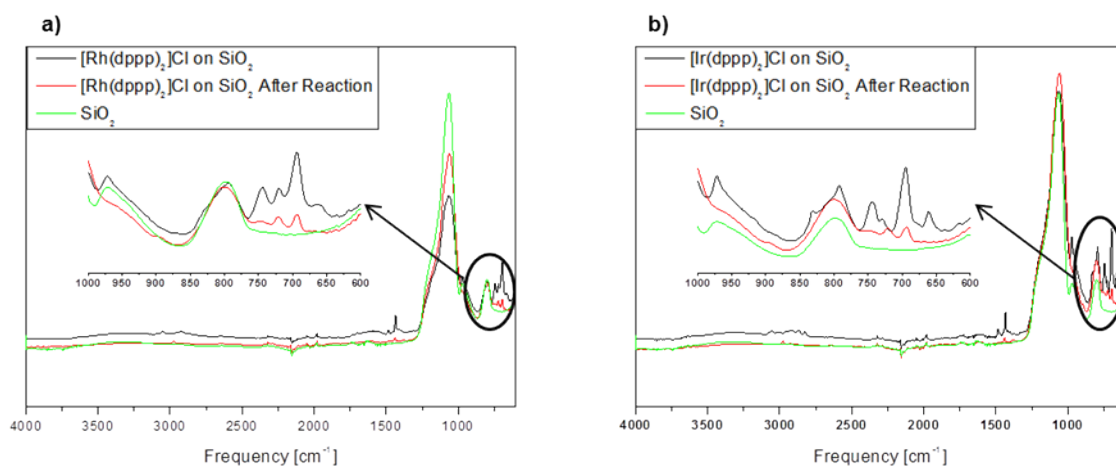

**S1.** FTIR spectra of a) Rh and b) Ir catalysts compared to the silica support material before and after reaction.

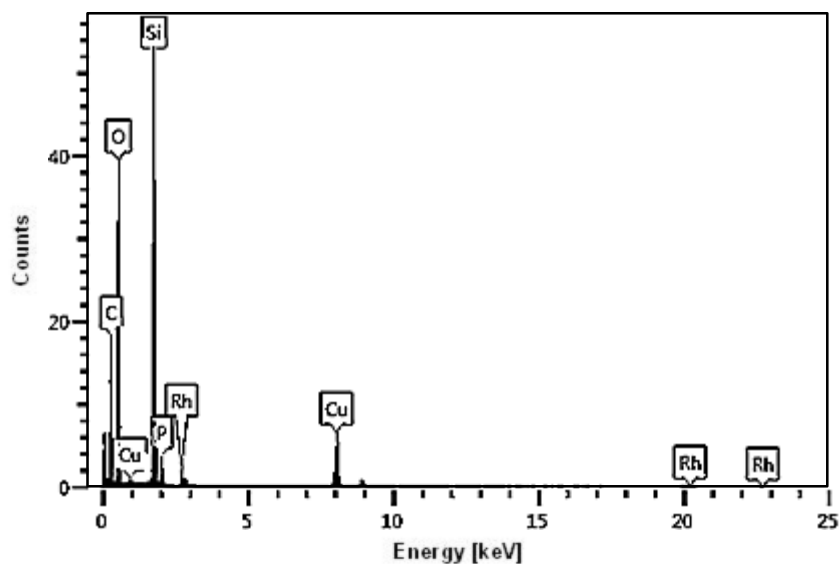

**S2.** EDX spectrum of  $[\text{Rh}(\text{dppp})_2]\text{Cl}/\text{SiO}_2$  (3 wt.% Rh) catalyst after decarbonylation showing signals from rhodium, phosphorous, silicium, oxygen and carbon.

| EDX                    | Before reaction  | After reaction   |
|------------------------|------------------|------------------|
|                        | 2.0              | 2.6              |
|                        | 2.1              | 2.2              |
| <i>Rh loading mol%</i> | 2.4              | 1.9              |
|                        | 1.7              | 1.8              |
|                        | 1.7              | 2.6              |
|                        | 2.1              | 2.0              |
| <b>Average mol%</b>    | <b>2.0 ± 0.3</b> | <b>2.2 ± 0.3</b> |
|                        | 3.0              | 2.0              |
|                        | 3.0              | 2.5              |
| <i>P-to-Rh ratio</i>   | 3.3              | 2.8              |
|                        | 3.6              | 2.8              |
|                        | 3.6              | 2.9              |
|                        | 3.7              | 3.3              |
| <b>Average ratio</b>   | <b>3.4 ± 0.3</b> | <b>2.7 ± 0.4</b> |

**S3.** EDX measurements of metal loading and phosphor content before and after decarbonylation reaction (average mol% and ratios based on six measurements).

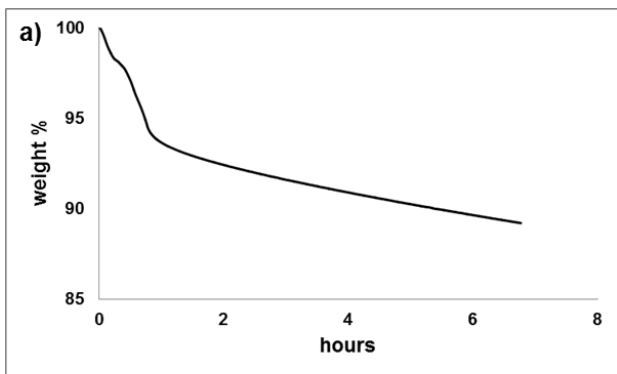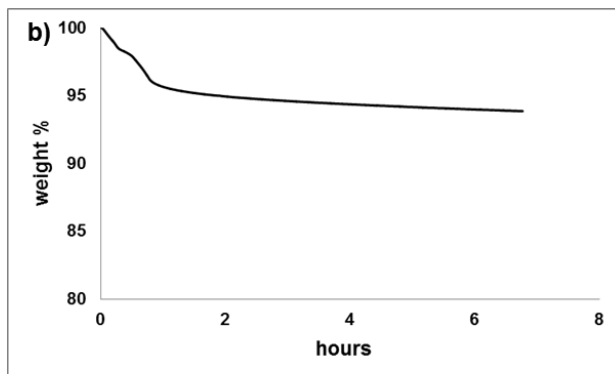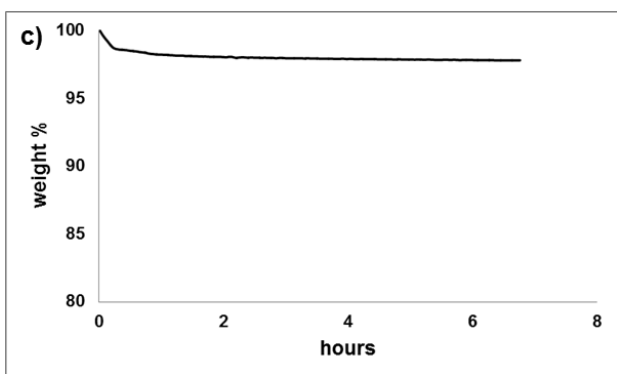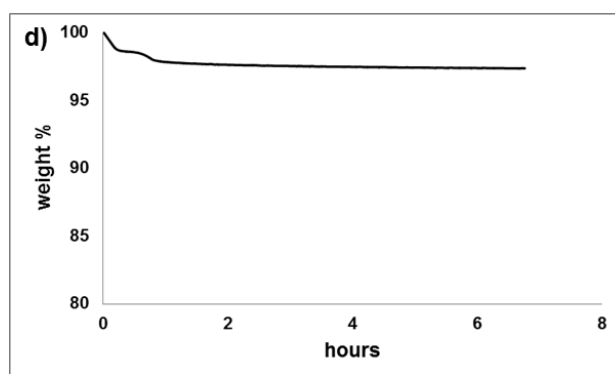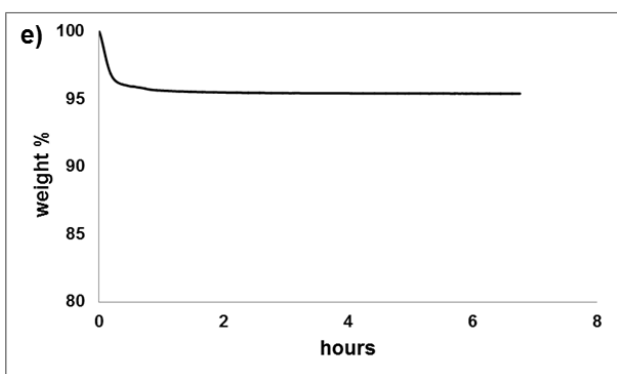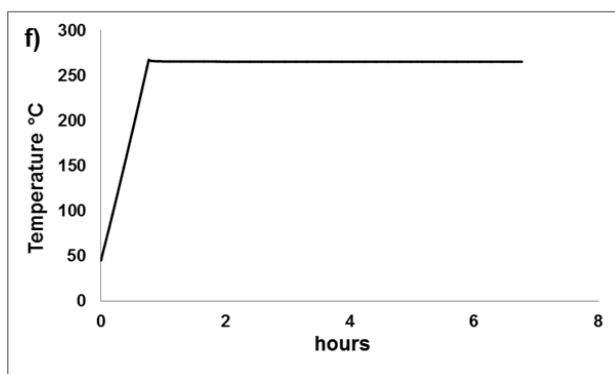

**S4.** TGA profiles for a)  $[\text{Rh}(\text{dppp})_2]\text{Cl}$ , b)  $[\text{Rh}(\text{dppp})_2]\text{Cl}/\text{SiO}_2$ , c)  $[\text{Rh}(\text{COD})\text{Cl}]_2/\text{SiO}_2$ , d)  $\text{RhCl}_3 \cdot x\text{H}_2\text{O}/\text{SiO}_2$ , e) silica-90 and f) temperature profile for the TGA measurements (heating rate of 5 °C/min from room temperature to 260 °C followed by constant temperature for 6 h).

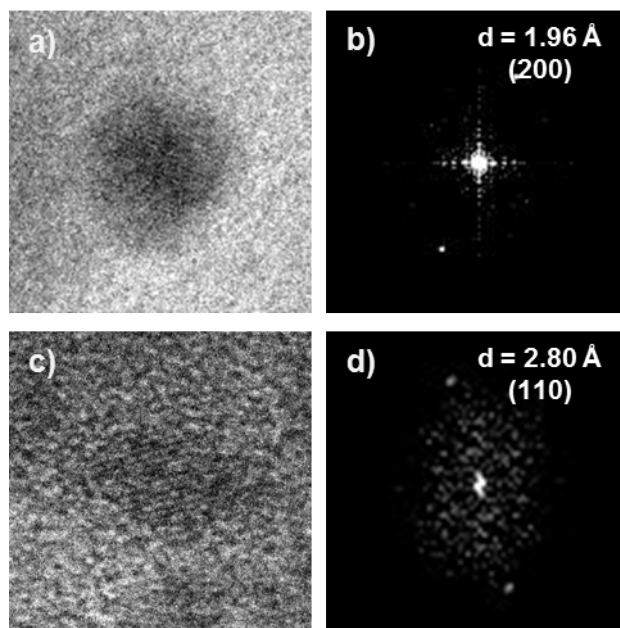

**S5.** TEM micrographs and corresponding fast Fourier transforms (FFTs) showing atomic resolution of the nanoparticles formed during the decarbonylation reaction with  $[\text{Rh}(\text{dppp})_2]\text{Cl}/\text{SiO}_2$  under the described experimental conditions.
